# Supplementary material
Source: PubMed Central journal article supplement (PMC4888237)

**Figure 2: original InstantBlue stained gels**

**A-TRIM25**

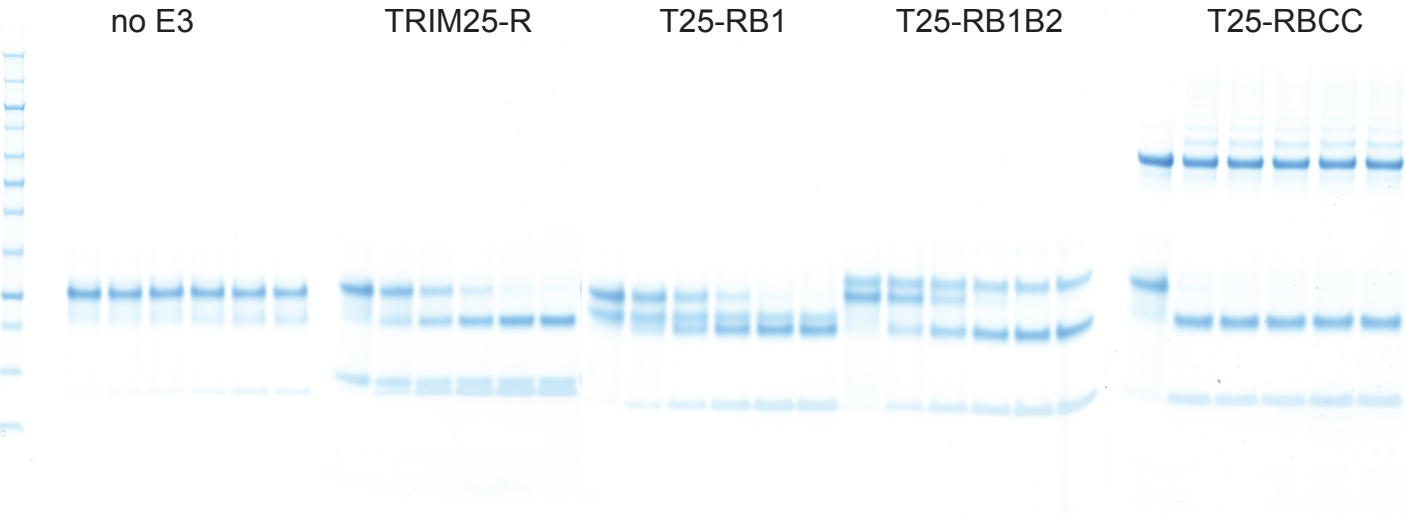

**C-TRIM32**

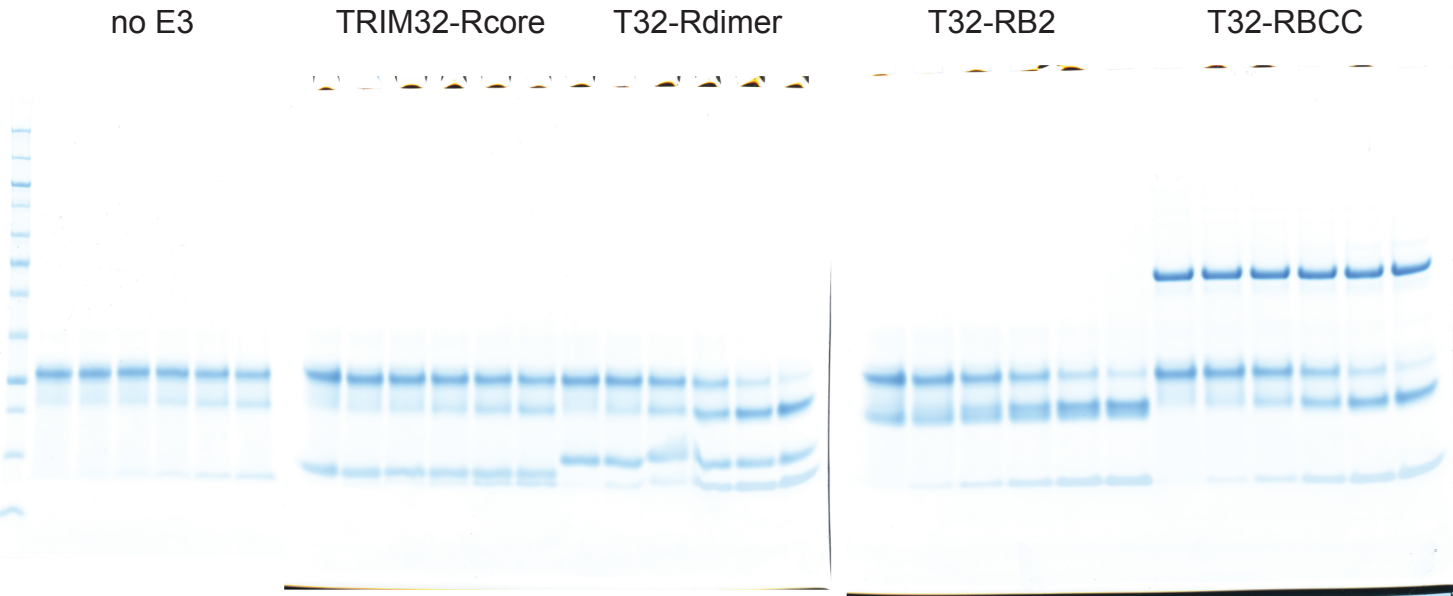

Figure 2: original InstantBlue stained gels

**E-TRIM25**

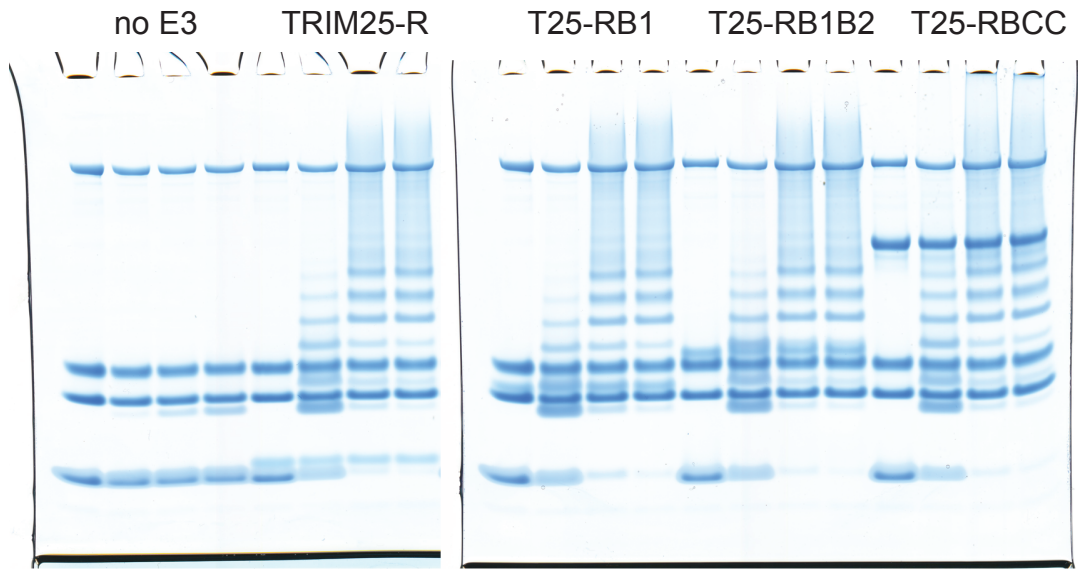

**G-TRIM32**

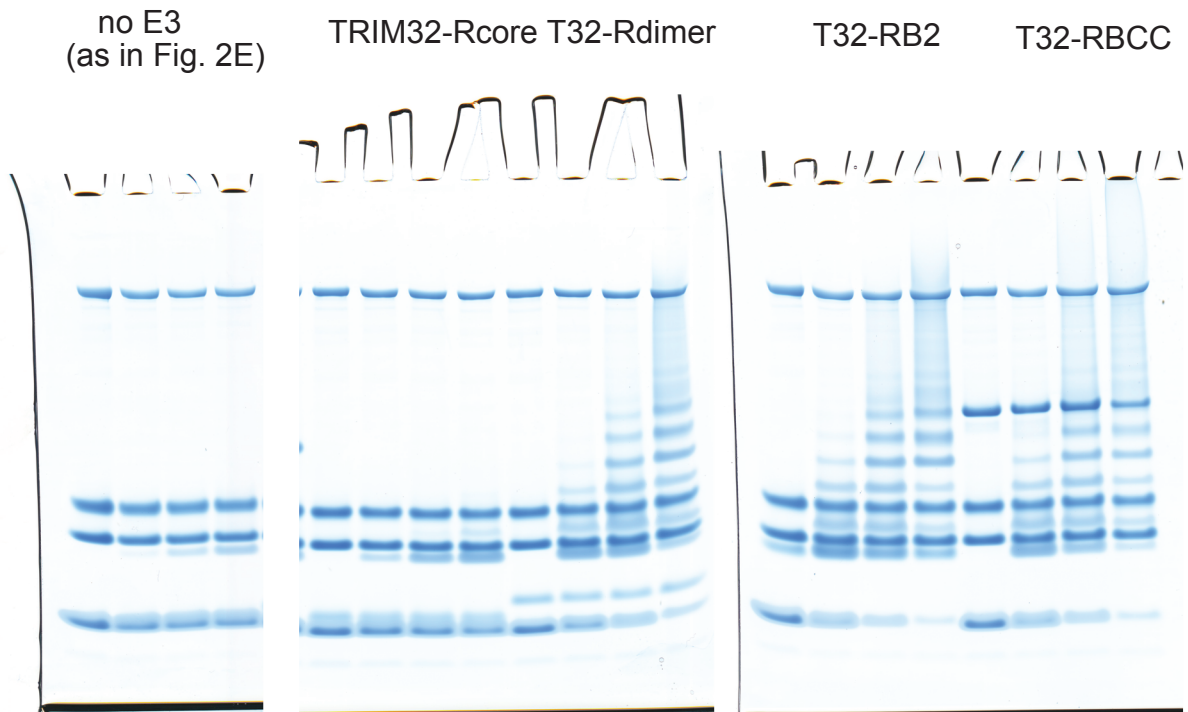

Supplement: EMBJ-35-1204-s002.pdf [file EMBJ-35-1204-s002.pdf]
