# Supplementary material
Source: PubMed Central journal article supplement (PMC4888237)

Figure 5: original InstantBlue stained gels

**B**  
**TRIM25**

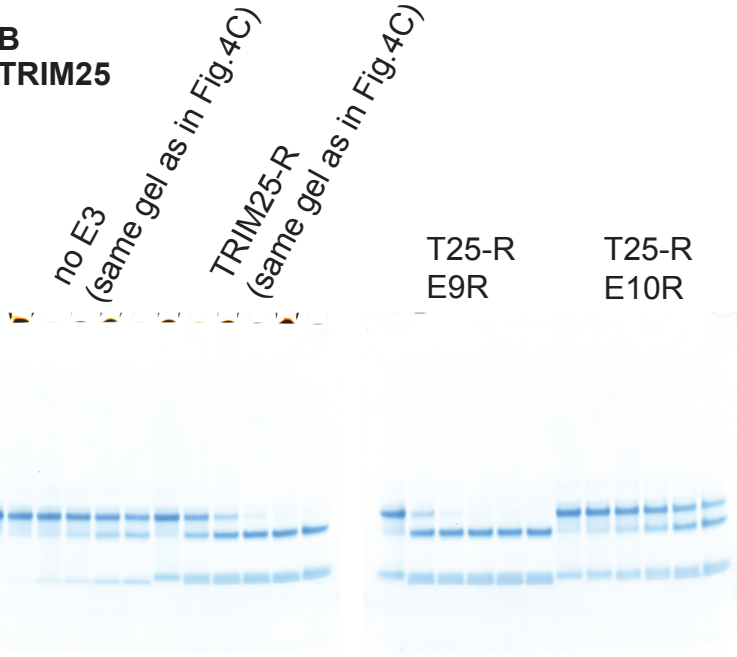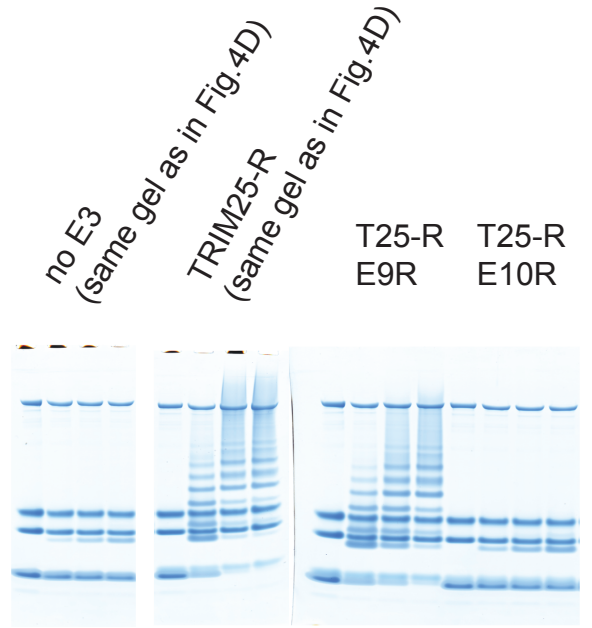

**C**  
**TRIM32**

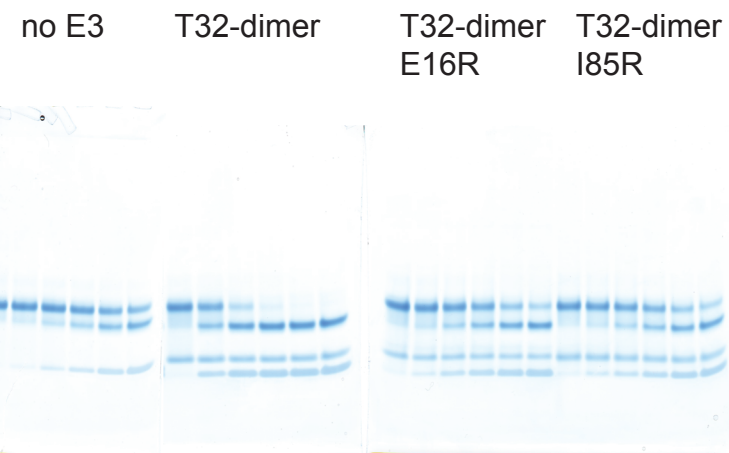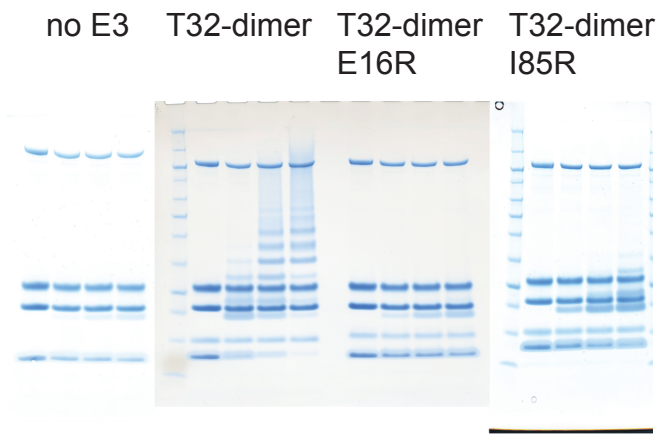

Supplement: EMBJ-35-1204-s004.pdf [file EMBJ-35-1204-s004.pdf]
